# Supplementary material for: The BAF53A-BACH1-GCLM axis regulates glutathione metabolism and enhances ferroptosis resistance in esophageal squamous cell carcinoma
Source: PeerJ journal article supplement (doi:10.7717/peerj.20156), 2025-10-03
Supplement: Original_Figures.zip [file 6I1.pdf › 6I1.pdf]

p-value =  $2.5e-07$

R = 0.37

log2(GCLM TPM)

8

7

6

5

4

3

2

4

5

6

7

8

log2(ACTL6A TPM)
