# Supplementary material for: The BAF53A-BACH1-GCLM axis regulates glutathione metabolism and enhances ferroptosis resistance in esophageal squamous cell carcinoma
Source: PeerJ. 2025 Oct 3;13:e20156. doi: 10.7717/peerj.20156 (PMC12499559; doi:10.7717/peerj.20156)
Supplement: Supplemental Information 5 [file peerj-13-20156-s005.xls]

## Sheet: Sheet1
ITEM TO CHECK	IMPORTANCE	CHECKLIST	Line and pages
EXPERIMENTAL DESIGN
Definition of experimental and control groups	E	ESCC cells vs normal epithelial cells	P8~9, line 110~115
Number within each group	E	n=3 per group, biological replicates	P8~9, line 110~115
Assay carried out by core lab or investigator's lab?	D	Performed in investigator's lab	P8~9, line 110~115
Acknowledgement of authors' contributions	D	Contributions listed in the manuscript	P8~9, line 110~115
SAMPLE
Description	E	Total RNA extracted from cultured human ESCC cells and control epithelial cells	P8~9, line 110~115
Volume/mass of sample processed	D
Microdissection or macrodissection	E	Not applicable; whole cultured cells were lysed directly	P8~9, line 110~115
Processing procedure	E	Standard TRIzol-based phase separation and RNA extraction	P8~9, line 110~115
If frozen - how and how quickly?	E	Snap-frozen in liquid nitrogen immediately	P8~9, line 110~115
If fixed - with what, how quickly?	E
Sample storage conditions and duration (especially for FFPE samples)	E	Stored at -80°C for less than one month	P8~9, line 110~115
NUCLEIC ACID EXTRACTION
Procedure and/or instrumentation	E	Manual TRIzol extraction protocol	P8~9, line 110~115
Name of kit and details of any modifications	E	TRIzol Reagent (Invitrogen), no modifications	P8~9, line 110~115
Source of additional reagents used	D
Details of DNase or RNAse treatment	E	Genomic DNA removed using TURBO DNase (10 min)	P8~9, line 110~115
Contamination assessment (DNA or RNA)	E	No template control (-RT) showed no amplification	P8~9, line 110~115
Nucleic acid quantification	E	NanoDrop 2000 spectrophotometer	P8~9, line 110~115
Instrument and method	E	UV absorbance at 260/280 nm	P8~9, line 110~115
Purity (A260/A280)	D	Approximately 2.0	P8~9, line 110~115
Yield	D
RNA integrity method/instrument	E	1% agarose gel electrophoresis	P8~9, line 110~115
RIN/RQI or Cq of 3' and 5' transcripts	E	Not applicable; integrity estimated by gel	P8~9, line 110~115
Electrophoresis traces	D
Inhibition testing (Cq dilutions, spike or other)	E	Not performed	P8~9, line 110~115
REVERSE TRANSCRIPTION
Complete reaction conditions	E	Standard SYBR Green qPCR protocol on ABI 7500	P8~9, line 110~115
Amount of RNA and reaction volume	E	2 μg RNA in a 20 μL reaction	P8~9, line 110~115
Priming oligonucleotide (if using GSP) and concentration	E
Reverse transcriptase and concentration	E	Contained in commercial SuperMix; exact concentration unknown	P8~9, line 110~115
Temperature and time	E	50°C for 15 min, 85°C for 5 sec
Manufacturer of reagents and catalogue numbers	D
Cqs with and without RT	D*	-RT control showed no amplification	P8~9, line 110~115
Storage conditions of cDNA	D	Stored at -20°C until use	P8~9, line 110~115
qPCR TARGET INFORMATION
If multiplex, efficiency and LOD of each assay.	E
Sequence accession number	E	Primers designed based on human EIF4A1 and GAPDH mRNA sequences	P8~9, line 110~115
Location of amplicon	D
Amplicon length	E	90–150 bp	P8~9, line 110~115
In silico specificity screen (BLAST, etc)	E	Validated by NCBI Primer-BLAST	P8~9, line 110~115
Pseudogenes, retropseudogenes or other homologs?	D
Sequence alignment	D
Secondary structure analysis of amplicon	D
Location of each primer by exon or intron (if applicable)	E	Primers span exon-exon junctions to avoid gDNA amplification	P8~9, line 110~115
What splice variants are targeted?	E	Primers designed to detect all major transcript variants	P8~9, line 110~115
qPCR OLIGONUCLEOTIDES
Primer sequences	E
RTPrimerDB Identification Number	D
Probe sequences	D**	None	P8~9, line 110~115
Location and identity of any modifications	E
Manufacturer of oligonucleotides	D
Purification method	D
qPCR PROTOCOL
Complete reaction conditions	E	Standard SYBR Green qPCR protocol on ABI 7500	P8~9, line 110~115
Reaction volume and amount of cDNA/DNA	E	20 μL total volume with 2 μL cDNA template	P8~9, line 110~115
Primer, (probe), Mg++ and dNTP concentrations	E	Included in commercial mix	P8~9, line 110~115
Polymerase identity and concentration	E	Contained in ChamQ Universal SYBR qPCR Master Mix (Vazyme)	P8~9, line 110~115
Buffer/kit identity and manufacturer	E	ChamQ Universal SYBR qPCR Master Mix (Vazyme)	P8~9, line 110~115
Exact chemical constitution of the buffer	D
Additives (SYBR Green I, DMSO, etc.)	E	SYBR Green I dye included in Master Mix	P8~9, line 110~115
Manufacturer of plates/tubes and catalog number	D
Complete thermocycling parameters	E
Reaction setup (manual/robotic)	D
Manufacturer of qPCR instrument	E	ABI 7500 Real-Time PCR System	P8~9, line 110~115
qPCR VALIDATION
Evidence of optimisation (from gradients)	D
Specificity (gel, sequence, melt, or digest)	E	Single peak in melt curve analysis	P8~9, line 110~115
For SYBR Green I, Cq of the NTC	E	No amplification observed in NTC	P8~9, line 110~115
Standard curves with slope and y-intercept	E	Not performed; relative quantification only	P8~9, line 110~115
PCR efficiency calculated from slope	E	Not calculated	P8~9, line 110~115
Confidence interval for PCR efficiency or standard error	D
r2 of standard curve	E	Not available	P8~9, line 110~115
Linear dynamic range	E
Cq variation at lower limit	E
Confidence intervals throughout range	D
Evidence for limit of detection	E
If multiplex, efficiency and LOD of each assay.	E
DATA ANALYSIS
qPCR analysis program (source, version)	E	ABI SDS Software v1.4	P8~9, line 110~115
Cq method determination	E	Automatic threshold	P8~9, line 110~115
Outlier identification and disposition	E
Results of NTCs	E	No amplification in no-template controls	P8~9, line 110~115
Justification of number and choice of reference genes	E	GAPDH selected based on stable Ct across samples	P8~9, line 110~115
Description of normalisation method	E	ΔΔCt method	P8~9, line 110~115
Number and concordance of biological replicates	D
Number and stage (RT or qPCR) of technical replicates	E	Three technical replicates per qPCR reaction	P8~9, line 110~115
Repeatability (intra-assay variation)	E	Ct standard deviation < 0.3	P8~9, line 110~115
Reproducibility (inter-assay variation, %CV)	D
Power analysis	D
Statistical methods for result significance	E	Student’s t-test or one-way ANOVA using GraphPad Prism	P8~9, line 110~115
Software (source, version)	E	GraphPad Prism v9	P8~9, line 110~115
Cq or raw data submission using RDML	D
Table 1. MIQE checklist for authors, reviewers and editors. All essential information (E) must be submitted with the manuscript. Desirable
information (D) should be submitted if available. If using primers obtained from RTPrimerDB, information on qPCR target, oligonucleotides,
protocols and validation is available from that source.
*: Assessing the absence of DNA using a no RT assay is essential when first extracting RNA. Once the sample has been validated as
RDNA-free, inclusion of a no-RT control is desirable, but no longer essential.
**: Disclosure of the probe sequence is highly desirable and strongly encouraged. However, since not all commercial pre-designed assay
vendors provide this information, it cannot be an essential requirement. Use of such assays is advised against.
