# Supplementary figures and images for: The BAF53A-BACH1-GCLM axis regulates glutathione metabolism and enhances ferroptosis resistance in esophageal squamous cell carcinoma
Source: PeerJ journal article supplement (doi:10.7717/peerj.20156), 2025-10-03

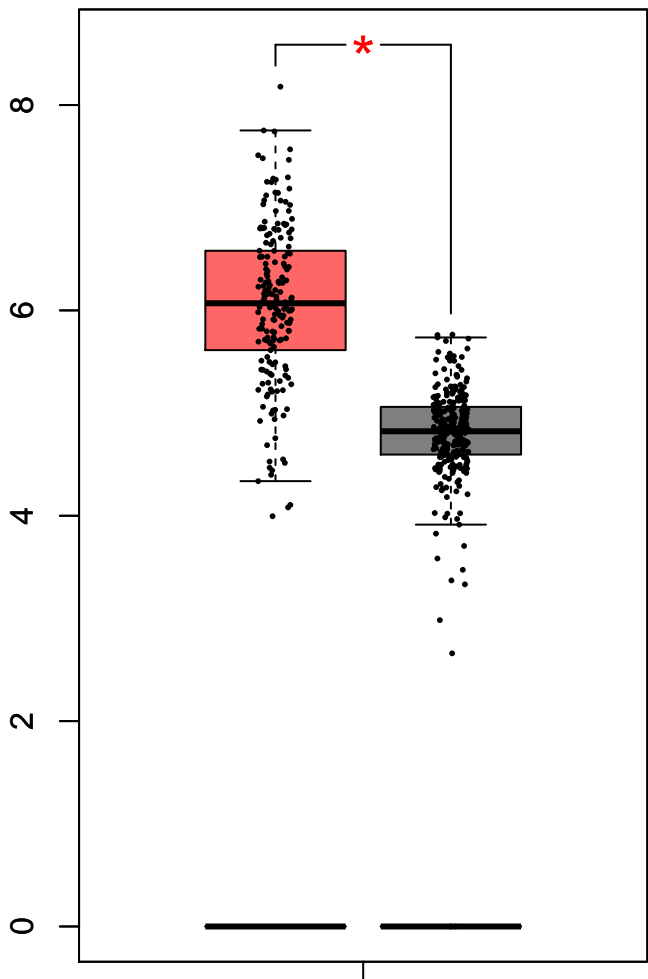

ESCA  
(num(T)=182; num(N)=286)

Supplement: Original_Figures.zip [file 1B.pdf › 1B.pdf]

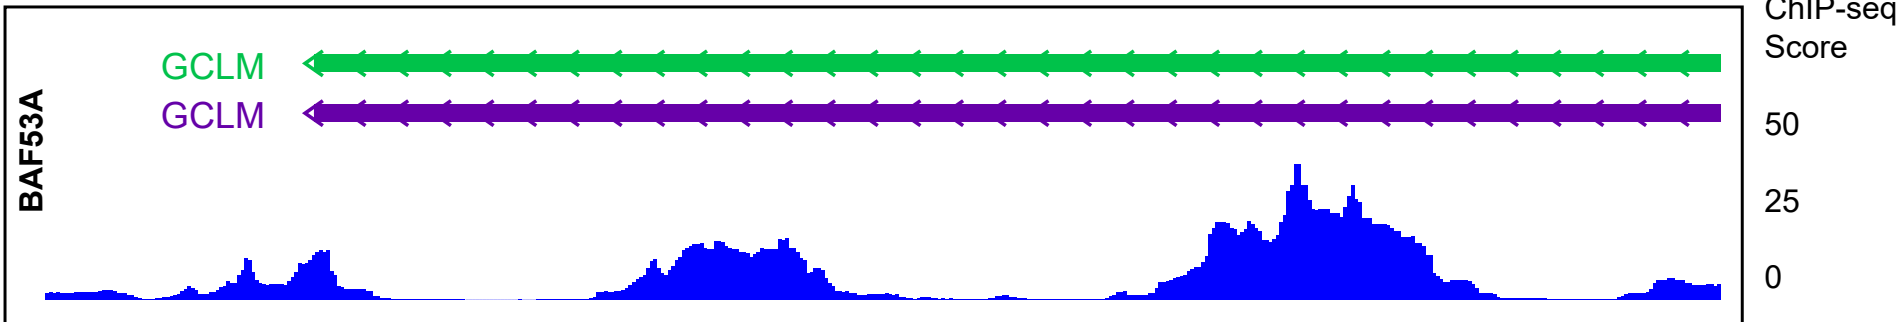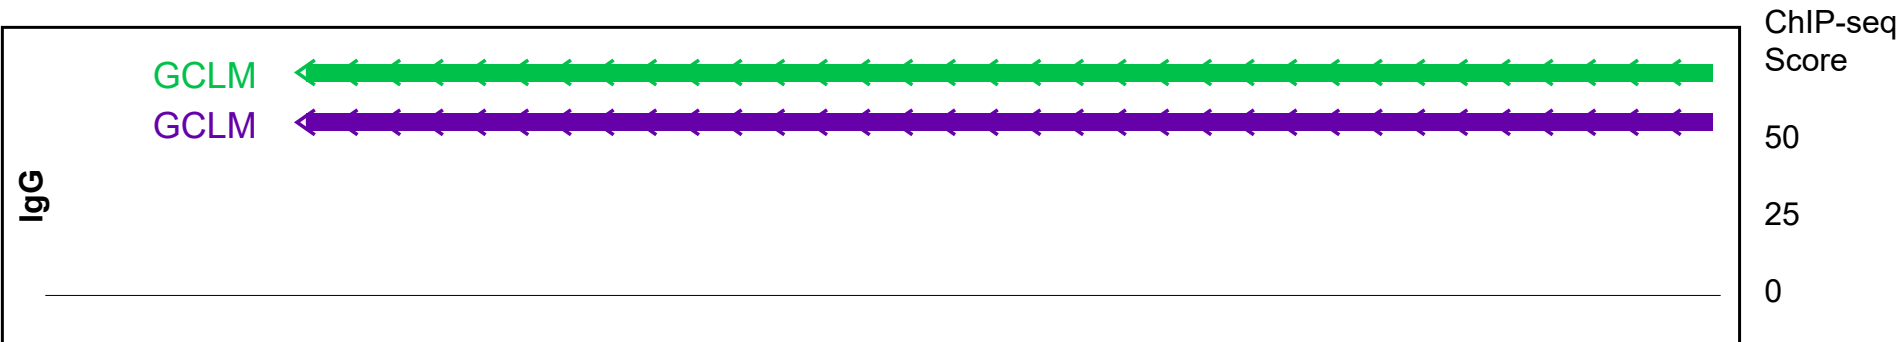

Supplement: Original_Figures.zip [file 4C-1.pdf › 4C-1.pdf]

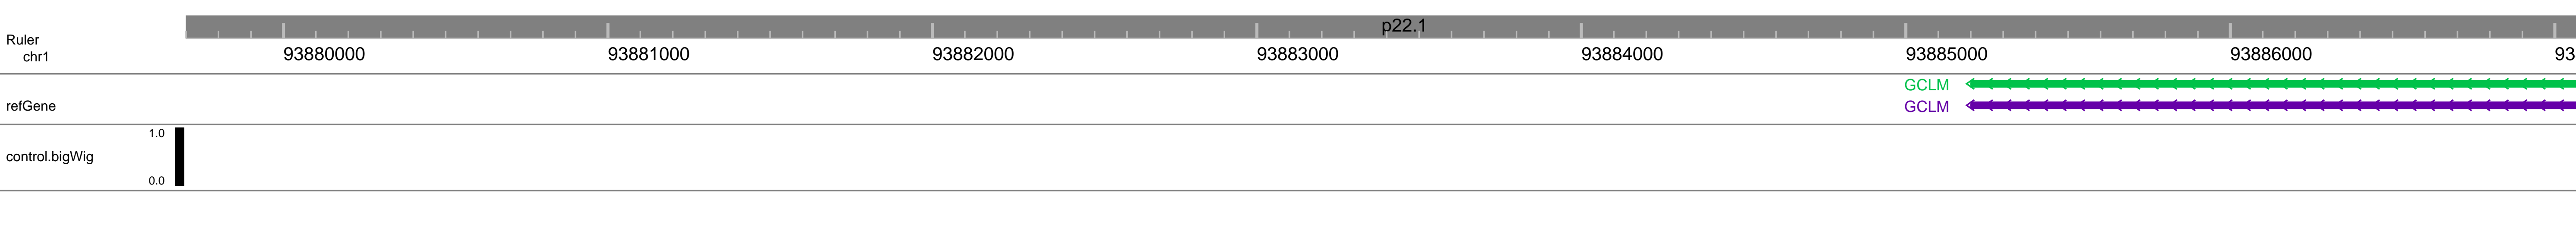

Supplement: Original_Figures.zip [file 4C-2.pdf › 4C-2.pdf]

p-value = 0.012

R = 0.19

log2(GCLM TPM)

8

7

6

5

4

3

2

2

3

4

5

6

log2(BACH1 TPM)

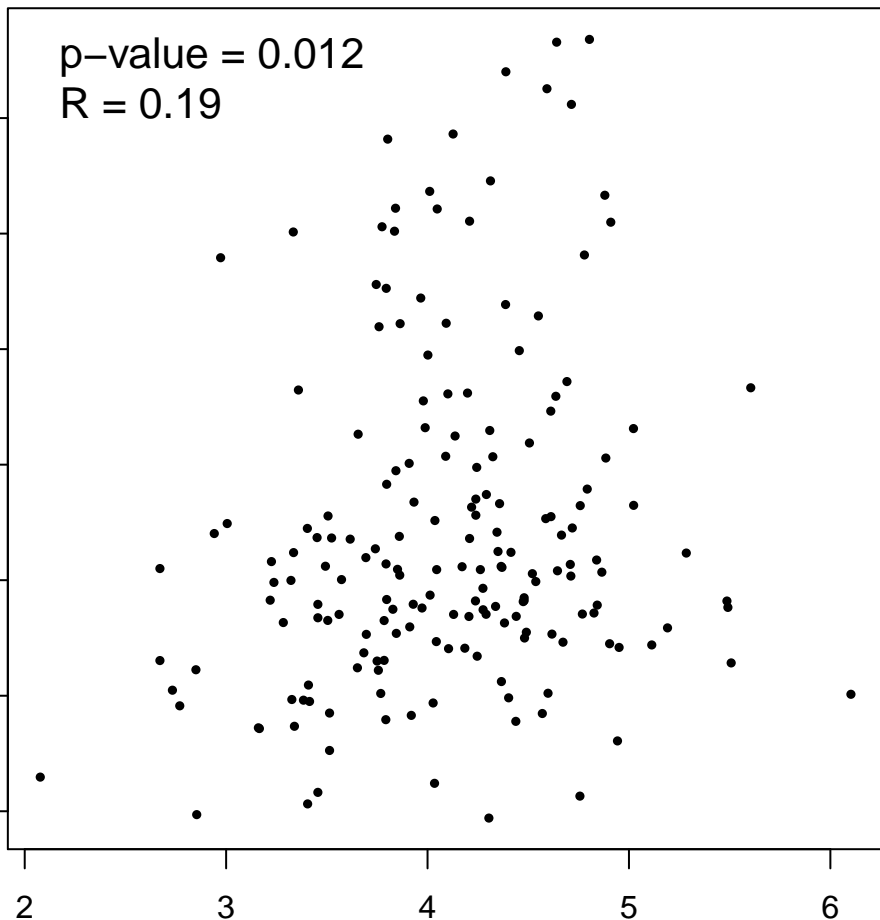

Supplement: Original_Figures.zip [file 6I2.pdf › 6I2.pdf]
